# Supplementary material for: Varying structural motifs, unusual X-band electron paramagnetic spectra, DFT studies and superoxide dismutase enzymatic activity of copper(ii) complexes withN′-[(E)-phenyl(pyridin-2-yl)methylidene]benzohydrazide
Source: Royal Society of Chemistry journal article supplement (doi:10.1039/c7nj04182a), 2018-01-01
Supplement: c7nj04182a1.pdf [file c7nj04182a1.pdf]

## Varying structural motifs, unusual X-band electron paramagnetic spectra, DFT studies and superoxide dismutase enzymatic activity of copper(II) complexes with N'-[(E)-phenyl(pyridin-2-yl)methylidene]benzohydrazide

Ram N. Patel<sup>a</sup>, Yogendra Singh<sup>\*a</sup>, Yogendra Pratap Singh<sup>a</sup>, Abhay K. Patel<sup>a</sup>, Neetu Patel<sup>a</sup>, Rita Singh<sup>b</sup>, Raymond J. Butcher<sup>c</sup>, Jerry P. Jasinski<sup>d</sup>, Enrique Colacio<sup>e</sup> and Maria A. Palacios<sup>e</sup><sup>a</sup>Department of Chemistry, A.P.S. University, Rewa (M.P.) 486003 India<sup>b</sup>Department of Physics, Govt. Model Science College, Rewa (M.P.) 486001 India<sup>c</sup>Department of Inorganic & Structural Chemistry, Howard University, Washington DC, 22031 USA<sup>d</sup>Department of Chemistry, Keene State College, 229 Main Street, Keene, NH 03435-2001<sup>e</sup>Departamento de QuimicaInorganica, Universidad de Granada, Av/Fuentenuueva S/N, 18071, Granada, Spain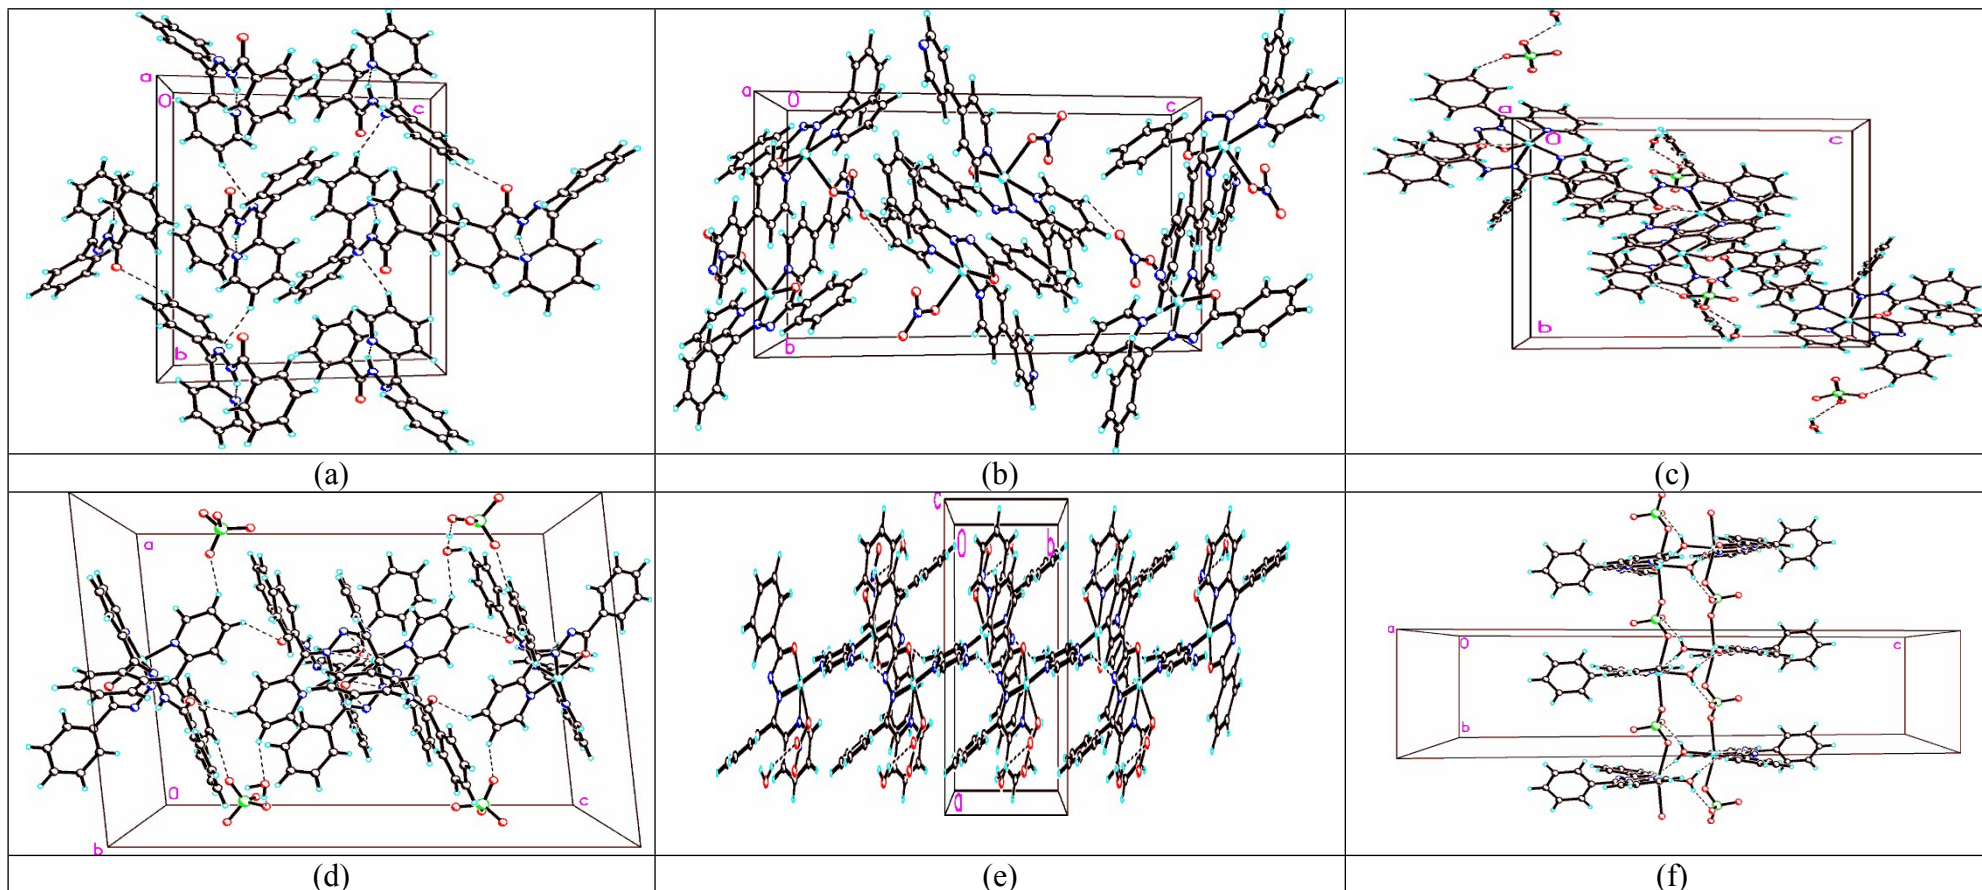

Fig. S1 (a) Inter- and intramolecular interactions in **HL**. (b) Intermolecular interaction in complex **1**. (c) Inter- and intramolecular interaction in complex **2**. (d) Inter- and intramolecular interaction in complex **3**. (e) Inter- and intramolecular interaction in complex **4**. (f) Inter- and intramolecular interaction in complex **5**.

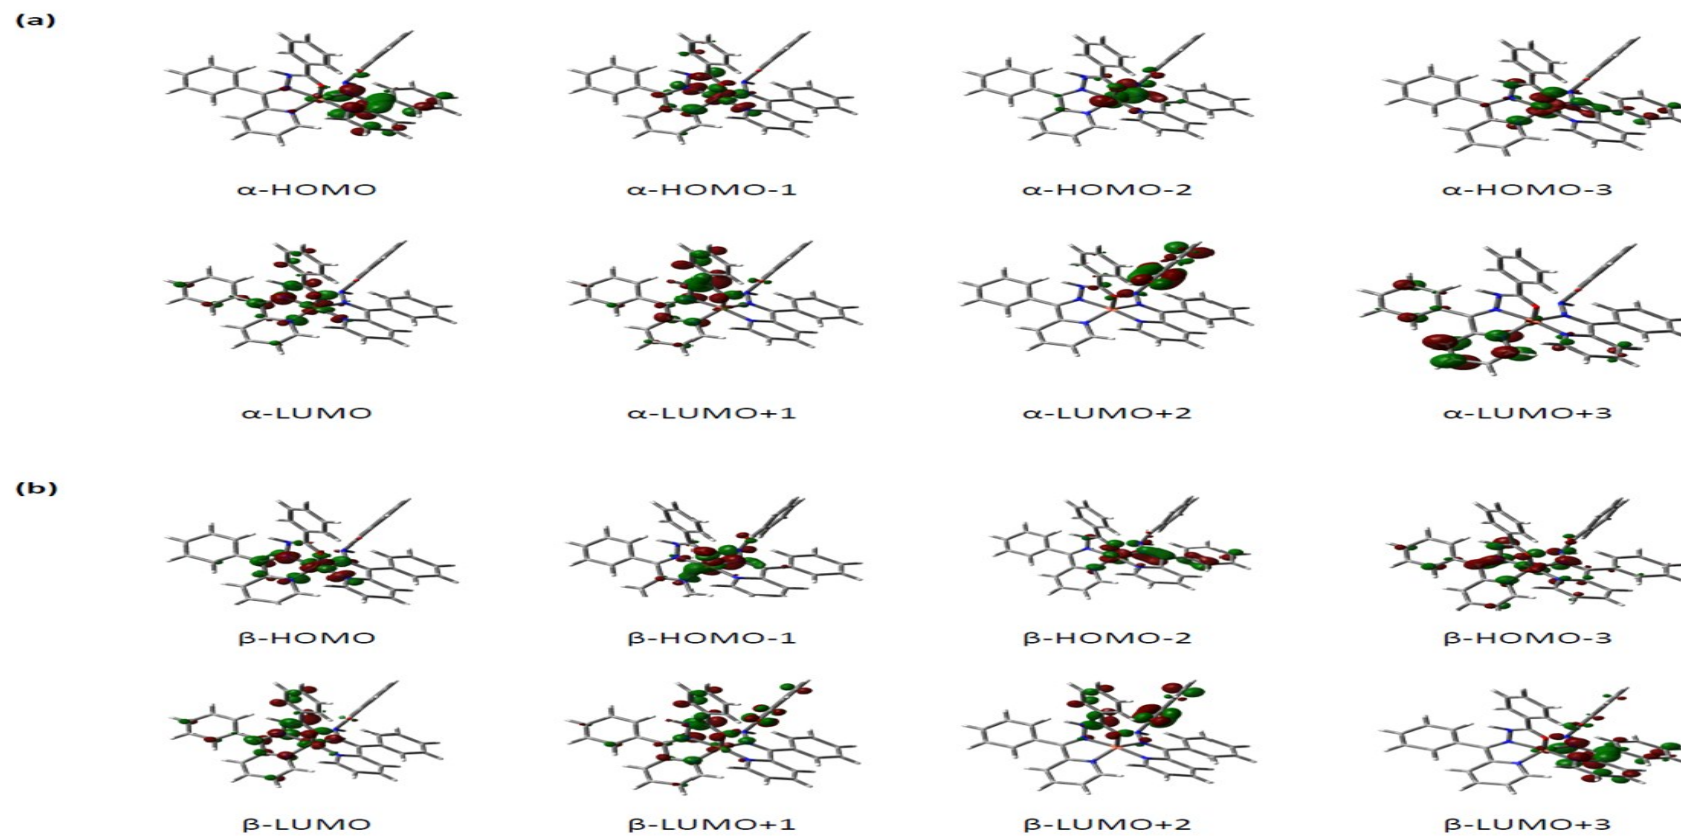

Fig. S2. (a) Some selected frontier plots of MO's ( $\alpha$ -spin) of **2**. (b) Some selected frontier Plots of some selected MO's ( $\beta$ -spin) of **3**.

(a)

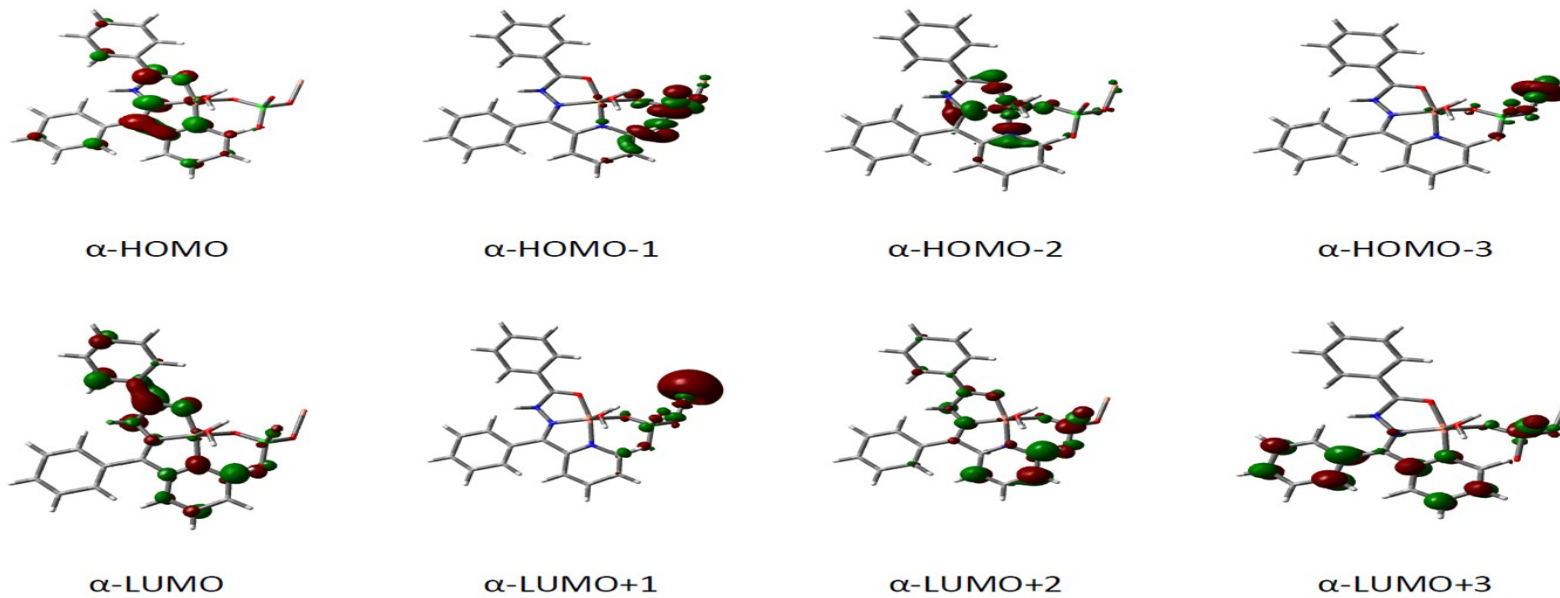

(b)

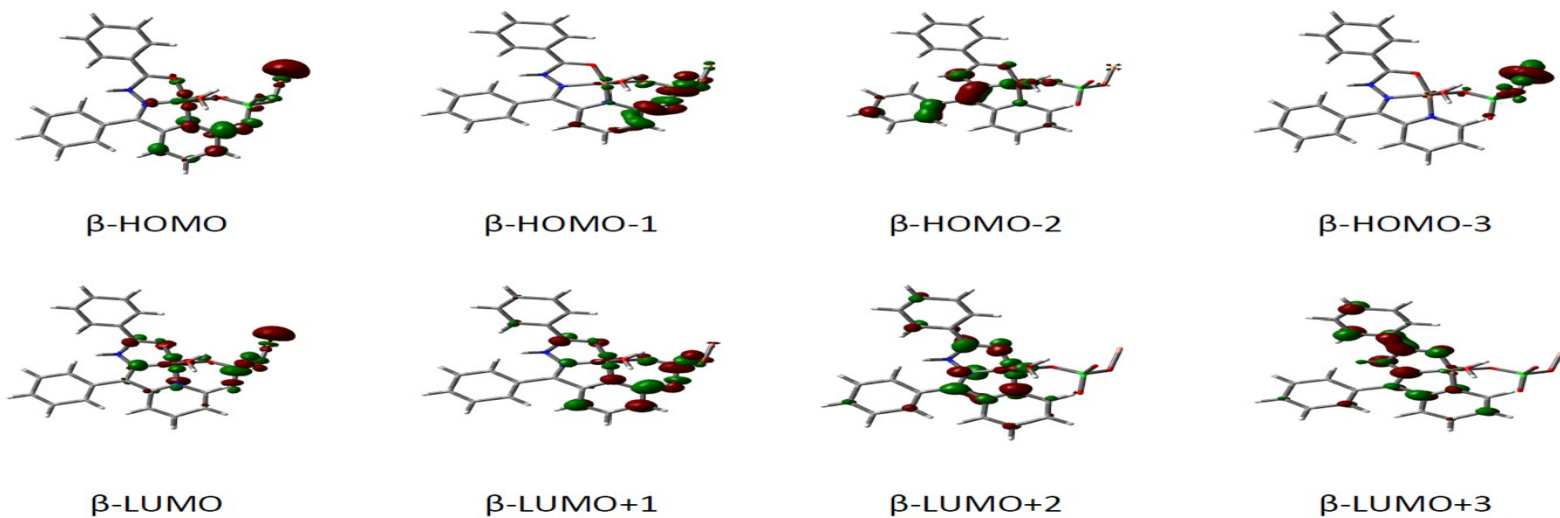

Figure S3. (a) Some selected frontier plots of MO's ( $\alpha$ -spin) of **5**. (b) Some selected frontier Plots of some selected MO's ( $\beta$ -spin) of **5**.

Table S1. Selected bond lengths [Å] and angles [°] refer to **1-5**.

| Parameters         | Single crystal XRD data | Theoretical data | Parameters        | Single crystal XRD data | Theoretical data |
|--------------------|-------------------------|------------------|-------------------|-------------------------|------------------|
| <b>1</b>           |                         |                  |                   |                         |                  |
| Cu-N(2)            | 1.924(2)                | 2.108            | Cu-O(1)           | 1.9818(18)              | 2.989            |
| Cu-N(4)            | 1.983(2)                | 2.098            | Cu-N(1)           | 2.023(2)                | 2.146            |
| Cu-O(11)           | 2.259(2)                | 2.387            |                   |                         |                  |
| N(2)-Cu-O(1)       | 79.67(8)                | 80.98            | N(2)-Cu-N(4)      | 167.79(9)               | 168.98           |
| O(1)-Cu-N(4)       | 97.32(8)                | 98.48            | N(2)-Cu-N(1)      | 80.36(9)                | 81.96            |
| O(1)-Cu-N(1)       | 159.83(8)               | 161.03           | N(4)-Cu-N(1)      | 101.61(9)               | 102.91           |
| N(2)-Cu-O(11)      | 105.31(8)               | 106.45           | O(1)-Cu-O(11)     | 98.23(8)                | 90.29            |
| N(4)-Cu-O(11)      | 86.80(8)                | 87.89            | N(1)-Cu-O(11)     | 89.77(9)                | 91.07            |
| <b>2</b>           |                         |                  |                   |                         |                  |
| Cu-N(2B)           | 1.929(2)                | 2.108            | Cu-O(1B)          | 1.977(2)                | 2.120            |
| Cu-N(1A)           | 1.997(2)                | 2.198            | Cu-N(1B)          | 2.007(2)                | 2.145            |
| Cu-N(2A)           | 2.389(2)                | 2.408            |                   |                         |                  |
| N(2B)-Cu-O(1B)     | 79.75(9)                | 80.93            | N(2B)-Cu-N(1A)    | 171.70(9)               | 171.70           |
| O(1B)-Cu-N(1A)     | 97.17(9)                | 98.46            | N(2B)-Cu-N(1B)    | 80.95(10)               | 80.95            |
| O(1B)-Cu-N(1B)     | 160.08(9)               | 161.48           | N(1A)-Cu-N(1B)    | 101.27(9)               | 101.27           |
| N(2B)-Cu-N(2A)     | 112.44(9)               | 113.49           | N(1A)-Cu-N(2A)    | 74.49(8)                | 74.49            |
| O(1B)-Cu-N(2A)     | 82.06(8)                | 83.38            | N(1B)-Cu-N(2A)    | 110.03(9)               | 111.45           |
| <b>3</b>           |                         |                  |                   |                         |                  |
| Cu(1)-N(5A)        | 1.927(2)                | 2.229            | Cu(1)-O(2A)       | 1.9746(18)              | 2.198            |
| Cu(1)-N(1A)        | 1.997(2)                | 2.108            | Cu(1)-N(4A)       | 2.004(2)                | 2.215            |
| Cu(1)-N(2A)        | 2.387(2)                | 2.456            | Cu(2)-N(5B)       | 1.924(2)                | 2.145            |
| Cu(2)-O(2B)        | 1.9798(18)              | 2.128            | Cu(2)-N(1B)       | 1.989(2)                | 2.178            |
| Cu(2)-N(4B)        | 2.006(2)                | 2.204            | Cu(2)-N(2B)       | 2.390(2)                | 2.509            |
| N(5A)-Cu(1)-O(2A)  | 79.71(8)                | 80.45            | N(5A)-Cu(1)-N(1A) | 170.57(9)               | 171.87           |
| O(2A)-Cu(1)-N(1A)  | 97.85(8)                | 98.45            | N(5A)-Cu(1)-N(4A) | 80.92(9)                | 81.73            |
| O(2A)-Cu(1)-N(4A)  | 160.08(8)               | 161.47           | N(1A)-Cu(1)-N(4A) | 100.52(9)               | 101.67           |
| N(5A)-Cu(1)-N(2A)  | 114.11(8)               | 115.54           | O(2A)-Cu(1)-N(2A) | 81.76(7)                | 82.46            |
| N(1A)-Cu(1)-N(2A)  | 74.27(8)                | 75.29            | N(4A)-Cu(1)-N(2A) | 110.62(8)               | 111.72           |
| N(5B)-Cu(2)-O(2B)  | 79.81(8)                | 80.41            | N(5B)-Cu(2)-N(1B) | 172.48(8)               | 173.58           |
| O(2B)-Cu(2)-N(1B)  | 96.46(8)                | 97.64            | N(5B)-Cu(2)-N(4B) | 80.96(9)                | 81.87            |
| O(2B)-Cu(2)-N(4B)  | 160.18(8)               | 161.58           | N(1B)-Cu(2)-N(4B) | 102.07(9)               | 103.45           |
| N(5B)-Cu(2)-N(2B)  | 111.26(8)               | 112.46           | O(2B)-Cu(2)-N(2B) | 82.49(7)                | 83.89            |
| N(1B)-Cu(2)-N(2B)  | 74.45(8)                | 75.62            | N(4B)-Cu(2)-N(2B) | 109.12(8)               | 111.15           |
| C(32B)-O(2B)-Cu(2) | 109.67(15)              | 110.57           |                   |                         |                  |
| <b>Compound 4</b>  |                         |                  |                   |                         |                  |

|                   |            |        |                   |            |        |
|-------------------|------------|--------|-------------------|------------|--------|
| Cu-N(2)           | 1.920(5)   | 2.124  | Cu-O(1)           | 1.963(4)   | 2.145  |
| Cu-N(5)           | 1.988(5)   | 2.184  | Cu-N(1)           | 2.020(5)   | 2.132  |
| Cu-O(11B)         | 2.31(5)    | 2.398  | Cu-O(11A)         | 2.31(2)    | 2.38   |
| N(2)-Cu-O(1)      | 80.29(18)  | 81.69  | N(2)-Cu-N(5)      | 174.4(2)   | 175.7  |
| O(1)-Cu-N(5)      | 94.41(19)  | 95.72  | N(2)-Cu-N(1)      | 80.6(2)    | 81.6   |
| O(1)-Cu-N(1)      | 160.46(17) | 161.57 | N(5)-Cu-N(1)      | 104.5(2)   | 105.7  |
| N(2)-Cu-O(11B)    | 92.0(10)   | 94.03  | O(1)-Cu-O(11B)    | 99.1(10)   | 100.5  |
| N(5)-Cu-O(11B)    | 90.5(10)   | 91.50  | N(1)-Cu-O(11B)    | 85.8(10)   | 86.7   |
| N(2)-Cu-O(11A)    | 93.9(4)    | 94.068 | O(1)-Cu-O(11A)    | 90.0(6)    | 91.8   |
| N(5)-Cu-O(11A)    | 87.8(4)    | 89.02  | N(1)-Cu-O(11A)    | 95.5(5)    | 96.6   |
| <b>Compound 5</b> |            |        |                   |            |        |
| Cu(1)-N(2)        | 1.9109(16) | 2.1324 | Cu(1)-O(1)        | 1.9468(14) | 2.1765 |
| Cu(1)-O(2)        | 1.9495(14) | 2.1490 | Cu(1)-N(1)        | 1.9850(16) | 2.1789 |
| Cu(1)-O(3)        | 2.5078(17) | 2.7012 | Cu(1)-O(4)#1      | 2.5449(16) | 2.7080 |
| N(2)-Cu(1)-O(1)   | 80.38(6)   | 81.56  | N(2)-Cu(1)-O(2)   | 172.15(7)  | 174.19 |
| O(1)-Cu(1)-O(2)   | 98.54(6)   | 99.65  | N(2)-Cu(1)-N(1)   | 81.49(7)   | 82.48  |
| O(1)-Cu(1)-N(1)   | 161.56(7)  | 162.86 | O(2)-Cu(1)-N(1)   | 99.87(6)   | 100.86 |
| N(2)-Cu(1)-O(3)   | 106.53(7)  | 108.09 | O(1)-Cu(1)-O(3)   | 94.85(6)   | 95.79  |
| O(2)-Cu(1)-O(3)   | 81.29(7)   | 82.56  | N(1)-Cu(1)-O(3)   | 87.12(6)   | 88.12  |
| N(2)-Cu(1)-O(4)#1 | 92.55(6)   | 93.65  | O(1)-Cu(1)-O(4)#1 | 97.88(5)   | 99.08  |
| O(2)-Cu(1)-O(4)#1 | 79.86(7)   | 80.96  | N(1)-Cu(1)-O(4)#1 | 86.21(6)   | 88.24  |
| O(3)-Cu(1)-O(4)#1 | 158.60(6)  | 159.69 |                   |            |        |

Table S2 Hydrogen bonds for complexes **HL** and **1-5** [Å and °]

| D-H...A               | d(D-H)    | d(H...A)  | d(D...A)   | <(DHA)    | Symmetry transformations used to generate equivalent atoms |
|-----------------------|-----------|-----------|------------|-----------|------------------------------------------------------------|
| <b>HL</b>             |           |           |            |           |                                                            |
| N(3)-H(3N)...N(1)     | 0.890(17) | 1.946(16) | 2.6652(14) | 136.7(13) | #1 -x+1, y+1/2, -z+1/2                                     |
| C(2)-H(2A)...N(2)#1   | 0.95      | 2.61      | 3.5133(16) | 158.2     |                                                            |
| <b>1</b>              |           |           |            |           |                                                            |
| C(1)-H(1A)...N(5)#1   | 0.95      | 2.47      | 3.320(4)   | 148.8     | #1 -x,-y+2,-z+1 #2 -x+1/2,y-1/2,-z+1/2 #3 -x+1,-y+1,-z+1   |
| C(2)-H(2A)...O(13)#2  | 0.95      | 2.54      | 3.195(4)   | 126.2     |                                                            |
| C(20)-H(20A)...N(3)#3 | 0.95      | 2.69      | 3.505(3)   | 144.7     |                                                            |
| C(24)-H(24A)...O(11)  | 0.95      | 2.37      | 2.915(3)   | 115.7     |                                                            |

|                          |           |          |            |         |                                                            |
|--------------------------|-----------|----------|------------|---------|------------------------------------------------------------|
| <b>2</b>                 |           |          |            |         |                                                            |
| C(1A)-H(1A)...N(3B)#1    | 0.95      | 2.69     | 3.487(2)   | 141.7   | #1 -x+1,-y+1,-z+1 #2 -x,y+1/2,-z+1/2 #3 -x,-y,-z+1         |
| C(2B)-H(2B)...O(21^b)#2  | 0.95      | 2.48     | 3.277(6)   | 141.2   |                                                            |
| C(2B)-H(2B)...O(1W)#2    | 0.95      | 2.39     | 3.265(8)   | 153.6   |                                                            |
| O(23^b)-H(1W1)...O(21^b) | 1.11      | 1.56     | 2.314(10)  | 119.2   |                                                            |
| O(1W)-H(1W1)...O(22^b)#3 | 0.88      | 2.34     | 2.979(11)  | 130.4   |                                                            |
| O(1W)-H(1W1)...O(23^b)   | 0.88      | 1.11     | 1.798(12)  | 129.4   |                                                            |
| O(21^b)-H(1W2)...O(23^b) | 0.65      | 1.85     | 2.314(10)  | 128.5   |                                                            |
| O(1W)-H(1W2)...O(11^a)   | 0.83      | 2.35     | 2.865(10)  | 120.6   |                                                            |
| O(1W)-H(1W2)...O(24^b)   | 0.83      | 1.98     | 2.438(12)  | 113.4   |                                                            |
| O(1W)-H(1W2)...Cl(3^c)   | 0.83      | 2.23     | 2.955(14)  | 144.9   |                                                            |
| O(1W)-H(1W2)...O(31^c)   | 0.83      | 1.10     | 1.92(2)    | 168.5   |                                                            |
| O(1W)-H(1W2)...O(34^c)   | 0.83      | 2.63     | 3.12(3)    | 118.7   |                                                            |
| <b>3</b>                 |           |          |            |         |                                                            |
| C(1A)-H(1AA)...N(6A)#1   | 0.95      | 2.67     | 3.475(3)   | 143.2   | #1 -x+1,-y+1,-z+2 #2 x-1/2,-y+1/2,z-1/2                    |
| C(21A)-H(21A)...O(21)#2  | 0.95      | 2.34     | 3.176(4)   | 146.4   | #3 -x+1,-y+1,-z+1,#4 x+1/2,-y+1/2,z-1/2                    |
| C(1B)-H(1BA)...N(6B)#3   | 0.95      | 2.69     | 3.478(3)   | 140.7   |                                                            |
| C(21B)-H(21B)...O(1W)    | 0.95      | 2.44     | 3.307(4)   | 151.0   |                                                            |
| O(1W)-H(1W1)...O(14)     | 0.928(19) | 2.11(4)  | 2.904(4)   | 142(5)  |                                                            |
| O(1W)-H(1W2)...O(22)#4   | 0.901(19) | 2.47(6)  | 2.971(6)   | 116(5)  |                                                            |
| <b>4</b>                 |           |          |            |         |                                                            |
| O(1W)-1W1)...O(12A)      | 0.82(3)   | 2.74(9)  | 3.37(3)    | 134(10) | #1 -x+1,-y+2,-z+1 #2 -x+3/2,y-1/2,-z+3/2 #3 -x+1,-y+1,-z+1 |
| O(1W)-H(1W1)...O(13A)    | 0.82(3)   | 2.28(10) | 2.97(3)    | 143(14) | #4 x-1/2,-y+3/2,z-1/2 #5 -x+2,-y+1,-z+1                    |
| O(1W)-H(1W1)...O(12B)    | 0.82(3)   | 2.15(9)  | 2.82(4)    | 139(11) | #6 -+3/2,y+1/2,-z+3/2                                      |
| O(1W)-H(1W2)...O(11A)#2  | 0.82(3)   | 2.41(5)  | 3.20(2)    | 162(13) |                                                            |
| O(1W)-H(1W2)...O(13B)#2  | 0.82(3)   | 2.36(13) | 2.89(5)    | 124(12) |                                                            |
| N(6)-H(6A)...N(3)#3      | 0.88      | 2.20     | 2.975(11)  | 146.3   |                                                            |
| N(6)-H(6B)...O(1W)#4     | 0.88      | 2.25     | 3.094(14)  | 159.4   |                                                            |
| C(1)-H(1A)...N(6)        | 0.95      | 2.60     | 3.225(12)  | 123.6   |                                                            |
| C(4)-H(4A)...O(12A)#5    | 0.95      | 2.63     | 3.206(12)  | 119.9   |                                                            |
| C(21)-H(21A)...O(1W)#6   | 0.95      | 2.37     | 3.208(10)  | 147.4   |                                                            |
| C(21)-H(21A)...O(11A)    | 0.95      | 2.30     | 2.840(13)  | 115.3   |                                                            |
| <b>5</b>                 |           |          |            |         |                                                            |
| C(2)-H(2)...O(5)#2       | 0.95      | 2.62     | 3.226(3)   | 122.2   | #1 x,y-1,z #2 x-1/2,y-1/2,z #3 -x+3/2,-y+3/2,-z+1          |
| O(2)- (102)...O(1)#3     | 0.82(3)   | 1.86(3)  | 2.6663(19) | 167(3)  |                                                            |
| O(2)- (101)...O(5)#3     | 0.73(3)   | 2.12(3)  | 2.819(2)   | 162(3)  |                                                            |

Table S3. TD-DFT calculated electronic transitions for the complex **1-3** and **5**

| Excitation (eV) | Wavelength (nm) | Oscillator strength ( <i>f</i> ) | Major Contribution                                    | Transition assignment            | Exp. Wave length (nm) |
|-----------------|-----------------|----------------------------------|-------------------------------------------------------|----------------------------------|-----------------------|
| <b>1</b>        |                 |                                  |                                                       |                                  |                       |
| 0.2019          | 870             | 0.0000                           | $\alpha$ HOMO $\rightarrow$ $\alpha$ LUMO (82%)       | $d_{yz} \rightarrow d_{x^2-y^2}$ | -                     |
| 0.3263          | 720             | 0.0027                           | $\alpha$ HOMO $\rightarrow$ $\alpha$ LUMO +1 (41%)    | Cu-d $\rightarrow d_{x^2-y^2}$   | 678                   |
| 0.3896          | 530             | 0.0000                           | $\alpha$ HOMO-1 $\rightarrow$ $\alpha$ LUMO+1(74%)    | LMCT                             | -                     |
| 0.5557          | 395             | 0.0000                           | $\alpha$ HOMO $\rightarrow$ $\alpha$ LUMO +2(61%)     | LMCT                             | 420                   |
| <b>2</b>        |                 |                                  |                                                       |                                  |                       |
| 0.6724          | 863             | 0.0031                           | $\alpha$ HOMO-3 $\rightarrow$ $\alpha$ LUMO + 1 (47%) | $d_{xz} \rightarrow d_{x^2-y^2}$ | -                     |
| 0.8275          | 705             | 0.0300                           | $\alpha$ HOMO $\rightarrow$ $\alpha$ LUMO+1 (82%)     | $d_{xz} \rightarrow d_{x^2-y^2}$ | 686                   |
| 0.8680          | 460             | 0.0265                           | $\alpha$ HOMO-4 $\rightarrow$ $\alpha$ LUMO (34%)     | LMCT                             | 407                   |
| 0.8871          | 399             | 0.0000                           | $\alpha$ HOMO-1 $\rightarrow$ $\alpha$ LUMO + 1 (34%) | LMCT                             | -                     |
| <b>3</b>        |                 |                                  |                                                       |                                  |                       |
| 0.2415          | 843             | 0.0000                           | $\alpha$ HOMO-1 $\rightarrow$ $\alpha$ LUMO+1 (63%)   | $d_{xz} \rightarrow d_{x^2-y^2}$ | -                     |
| 0.6363          | 715             | 0.0000                           | $\alpha$ HOMO $\rightarrow$ $\alpha$ LUMO+1 (76%)     | $d_{xz} \rightarrow d_{x^2-y^2}$ | 681                   |
| 0.8038          | 465             | 0.0045                           | $\alpha$ HOMO-1 $\rightarrow$ $\alpha$ LUMO (65%)     | LMCT                             | -                     |
| 0.8873          | 396             | 0.0000                           | $\alpha$ HOMO $\rightarrow$ $\alpha$ LUMO +2 (45%)    | LMCT                             | 412                   |
| <b>5</b>        |                 |                                  |                                                       |                                  |                       |
| 0.6660          | 833             | 0.0047                           | $\alpha$ HOMO $\rightarrow$ $\alpha$ LUMO+3 (40%)     | $d_{xz} \rightarrow d_{x^2-y^2}$ | -                     |
| 0.7857          | 685             | 0.0249                           | $\alpha$ HOMO $\rightarrow$ $\alpha$ LUMO+1 (41%)     | $d_{xz} \rightarrow d_{x^2-y^2}$ | 677                   |
| 0.9523          | 455             | 0.0707                           | $\alpha$ HOMO $\rightarrow$ $\alpha$ LUMO +2 (59%)    | LMCT                             | 420                   |
| 1.1011          | 398             | 0.0060                           | $\alpha$ HOMO $\rightarrow$ $\alpha$ LUMO +1 (95%)    | LMCT                             | -                     |

Table S4. Molecular orbital energies and compositions of some selected orbitals for complex **1**

| Orbital | Energy (eV)    |               | % of Metal     |               | % of ligand    |               |
|---------|----------------|---------------|----------------|---------------|----------------|---------------|
|         | $\alpha$ -spin | $\beta$ -spin | $\alpha$ -spin | $\beta$ -spin | $\alpha$ -spin | $\beta$ -spin |
| LUMO+9  | -0.5553        | -0.5553       | 0              | 0             | 100            | 100           |
| LUMO +8 | -1.0267        | -1.0267       | 0              | 0             | 100            | 100           |
| LUMO +7 | -1.0811        | -1.0811       | 0              | 0             | 100            | 100           |
| LUMO +6 | -1.1091        | -1.1091       | 0              | 0             | 100            | 100           |
| LUMO +5 | -1.2607        | -1.2607       | 0              | 0             | 100            | 100           |
| LUMO +4 | -1.5181        | -1.5181       | 10             | 10            | 90             | 90            |
| LUMO +3 | -1.8419        | -1.8419       | 0              | 0             | 100            | 100           |
| LUMO +2 | -2.2538        | -2.2538       | 20             | 20            | 80             | 80            |
| LUMO +1 | -2.4101        | -2.4101       | 10             | 0             | 90             | 100           |
| LUMO    | -2.7826        | -2.7826       | 10             | 10            | 90             | 90            |
| HOMO    | -4.0420        | -4.0420       | 45             | 45            | 55             | 55            |
| HOMO-1  | -5.1082        | -5.1082       | 15             | 15            | 85             | 85            |
| HOMO-2  | -5.4592        | -5.4592       | 60             | 60            | 40             | 40            |
| HOMO-3  | -5.6560        | -5.6560       | 10             | 10            | 90             | 90            |
| HOMO-4  | -6.2799        | -6.2799       | 49             | 49            | 51             | 51            |
| HOMO-5  | -6.5763        | -6.5763       | 50             | 50            | 50             | 50            |
| HOMO-6  | -6.6731        | -6.6731       | 0              | 0             | 100            | 100           |
| HOMO-7  | -6.8998        | -6.8998       | 60             | 0             | 40             | 100           |
| HOMO-8  | -7.0051        | -7.0051       | 60             | 60            | 40             | 40            |
| HOMO-9  | -7.2835        | -7.2835       | 40             | 40            | 60             | 60            |



Table S 5. Molecular orbital energies and compositions of some selected orbitals for complex **2**

| Orbital | Energy (eV)    |               | % of Metal     |               | % of ligand    |               |
|---------|----------------|---------------|----------------|---------------|----------------|---------------|
|         | $\alpha$ -spin | $\beta$ -spin | $\alpha$ -spin | $\beta$ -spin | $\alpha$ -spin | $\beta$ -spin |
| LUMO+9  | -0.2798        | -0.3587       | 0              | 0             | 100            | 100           |
| LUMO +8 | -0.3890        | -0.4304       | 0              | 0             | 100            | 100           |
| LUMO +7 | -0.4891        | -0.4792       | 0              | 0             | 100            | 100           |
| LUMO +6 | -0.5374        | -0.6109       | 0              | 0             | 100            | 100           |
| LUMO +5 | -0.6152        | -0.7570       | 0              | 0             | 100            | 100           |
| LUMO +4 | -0.8387        | -1.0262       | 1              | 1             | 99             | 99            |
| LUMO +3 | -1.0166        | -1.1032       | 5              | 5             | 95             | 95            |
| LUMO +2 | -1.3564        | -1.3084       | 2              | 5             | 98             | 95            |
| LUMO +1 | -1.6825        | -1.5217       | 20             | 20            | 80             | 80            |
| LUMO    | -1.8152        | -1.8080       | 5              | 25            | 95             | 75            |
| HOMO    | -2.8375        | -3.5834       | 50             | 50            | 50             | 50            |
| HOMO-1  | -3.1842        | -5.2291       | 80             | 30            | 20             | 70            |
| HOMO-2  | -5.1532        | -5.6782       | 20             | 20            | 80             | 80            |
| HOMO-3  | -5.9270        | -6.1607       | 15             | 15            | 85             | 85            |
| HOMO-4  | -6.2682        | -6.4751       | 10             | 0             | 90             | 100           |
| HOMO-5  | -6.5085        | -6.6404       | 15             | 15            | 85             | 85            |
| HOMO-6  | -6.7294        | -6.6535       | 10             | 10            | 90             | 90            |
| HOMO-7  | -6.7691        | -6.7852       | 15             | 10            | 85             | 90            |
| HOMO-8  | -6.9600        | -6.9167       | 20             | 30            | 80             | 70            |
| HOMO-9  | -6.9596        | -6.9555       | 15             | 10            | 85             | 90            |

Table S6. Molecular orbital energies and compositions of some selected orbitals for complex **3**

| Orbital | Energy (eV)    |               | % of Metal     |               | % of ligand    |               |
|---------|----------------|---------------|----------------|---------------|----------------|---------------|
|         | $\alpha$ -spin | $\beta$ -spin | $\alpha$ -spin | $\beta$ -spin | $\alpha$ -spin | $\beta$ -spin |
| LUMO+9  | -0.2789        | -0.3578       | 0              | 0             | 100            | 100           |
| LUMO +8 | -0.3809        | -0.4340       | 0              | 0             | 100            | 100           |
| LUMO +7 | -0.4819        | -0.4729       | 0              | 0             | 100            | 100           |
| LUMO +6 | -0.5347        | -0.6190       | 0              | 0             | 100            | 100           |
| LUMO +5 | -0.6125        | -0.7507       | 0              | 0             | 100            | 100           |
| LUMO +4 | -0.8378        | -1.0226       | 1              | 1             | 99             | 99            |
| LUMO +3 | -1.0166        | -1.1023       | 5              | 5             | 95             | 95            |
| LUMO +2 | -1.3546        | -1.3048       | 2              | 5             | 98             | 95            |
| LUMO +1 | -1.6852        | -1.5271       | 20             | 20            | 80             | 80            |
| LUMO    | -1.8125        | -1.8008       | 5              | 25            | 95             | 75            |
| HOMO    | -2.8357        | -3.5843       | 50             | 50            | 50             | 50            |
| HOMO-1  | -3.1824        | -5.2219       | 80             | 30            | 20             | 70            |
| HOMO-2  | -5.1523        | -5.6728       | 20             | 20            | 80             | 80            |
| HOMO-3  | -5.9207        | -6.1670       | 15             | 15            | 85             | 85            |
| HOMO-4  | -6.2628        | -6.4715       | 10             | 0             | 90             | 100           |
| HOMO-5  | -6.5058        | -6.6440       | 15             | 15            | 85             | 85            |
| HOMO-6  | -6.7249        | -6.6553       | 10             | 10            | 90             | 90            |
| HOMO-7  | -6.7619        | -6.7825       | 15             | 10            | 85             | 90            |
| HOMO-8  | -6.9006        | -6.9167       | 20             | 30            | 80             | 70            |
| HOMO-9  | -6.9695        | -6.95556      | 15             | 10            | 85             | 90            |

Table S 7. Molecular orbital energies and compositions of some selected orbitals for complex **5**

| Orbital | Energy (eV)    |               | % of Metal     |               | % of ligand    |               |
|---------|----------------|---------------|----------------|---------------|----------------|---------------|
|         | $\alpha$ -spin | $\beta$ -spin | $\alpha$ -spin | $\beta$ -spin | $\alpha$ -spin | $\beta$ -spin |
| LUMO+9  | 0.2479         | 0.2274        | 0              | 0             | 100            | 100           |
| LUMO +8 | 0.1779         | 0.0117        | 0              | 0             | 100            | 100           |
| LUMO +7 | 0.0446         | -0.7205       | 0              | 0             | 100            | 100           |
| LUMO +6 | -0.7692        | -0.7545       | 0              | 0             | 100            | 100           |
| LUMO +5 | -0.8253        | -0.7793       | 0              | 0             | 100            | 100           |
| LUMO +4 | -0.8566        | -0.9477       | 0              | 0             | 100            | 100           |
| LUMO +3 | -1.1273        | -1.7105       | 0              | 15            | 100            | 85            |
| LUMO +2 | -2.0441        | -2.1296       | 0              | 30            | 100            | 70            |
| LUMO +1 | -2.1647        | -2.3881       | 80             | 20            | 20             | 80            |
| LUMO    | -2.3141        | -2.7056       | 5              | 15            | 95             | 85            |
| HOMO    | -3.6798        | -3.5492       | 5              | 40            | 95             | 60            |
| HOMO-1  | -5.0385        | -5.0015       | 10             | 5             | 05             | 99            |
| HOMO-2  | -6.3148        | -6.4525       | 30             | 10            | 70             | 90            |
| HOMO-3  | -6.6832        | -6.7855       | 10             | 1             | 90             | 99            |
| HOMO-4  | -6.7795        | -7.0185       | 20             | 2             | 80             | 98            |
| HOMO-5  | -6.9943        | -7.1709       | 100            | 80            | 0              | 20            |
| HOMO-6  | -7.1314        | -7.3292       | 100            | 100           | 0              | 0             |
| HOMO-7  | -7.1330        | -7.2190       | 100            | 80            | 0              | 20            |
| HOMO-8  | -7.2057        | -7.2438       | 50             | 45            | 50             | 55            |
| HOMO-9  | -7.2451        | -7.3075       | 30             | 45            | 70             | 55            |
